# Supplementary material
Source: PubMed Central journal article supplement (PMC7261005)
Supplement: NIHMS1582857-supplement-Supplementary_Figures_and_Methods.pdf [file NIHMS1582857-supplement-Supplementary_Figures_and_Methods.pdf]

# **Light-inducible generation of membrane curvature in live cells with engineered BAR domain proteins**

## **Supplementary Information**

Taylor Jones IV, Aofei Liu, and Bianxiao Cui\*

Department of Chemistry, Stanford University, Stanford, California 94305, United States

\*to whom correspondence should be addressed: bcui@stanford.edu

### **This PDF file includes:**

Supplementary Figures S1-S10

### **Other supplementary materials for this manuscript include the following:**

opto-FBAR.avi

opto-IBAR Bleach Corrected.avi

opto-IBAR uncorrected.avi

TubuleTracer1.3.txt

## Supplementary Figure S1

tdTomato-micro-FBP17(FL)  
+  
iLID-EGFP-CAAX

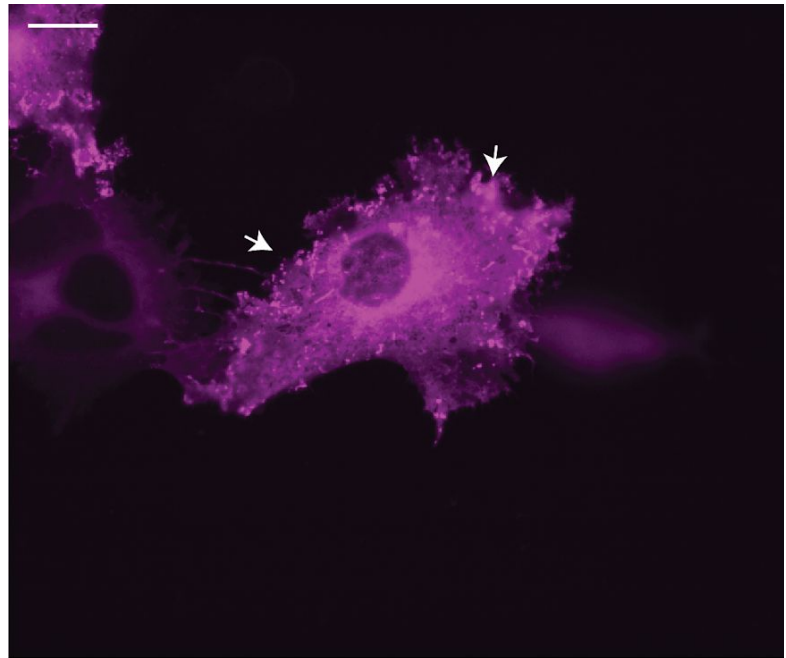

tdTomato-micro-FBP17(FL)  
only

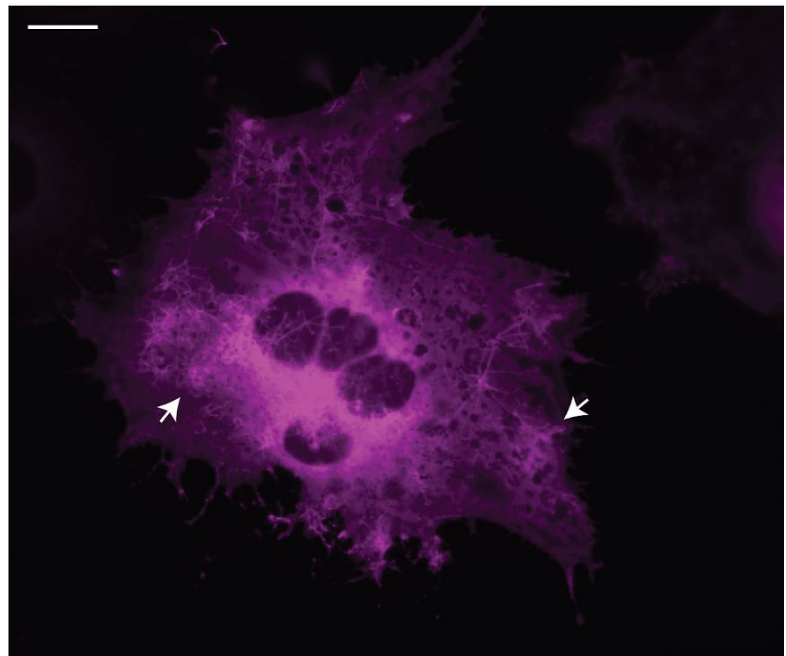

**Supplementary Figure S1:** opto-FBAR with FBP17(FL) exhibits high levels of tubulation (arrows) in the dark. *Top:* COS7 cells expressing tdTom-micro-FBP17(FL) with iLID-EGFP-CAAX in the dark. *Bottom:* COS7 cells expressing tdTom-micro-FBP17(FL) only. Images show the red channel (tdTom-micro-FBP17(FL)). Scale bar = 10  $\mu\text{m}$ .

**Supplementary Figure S2**

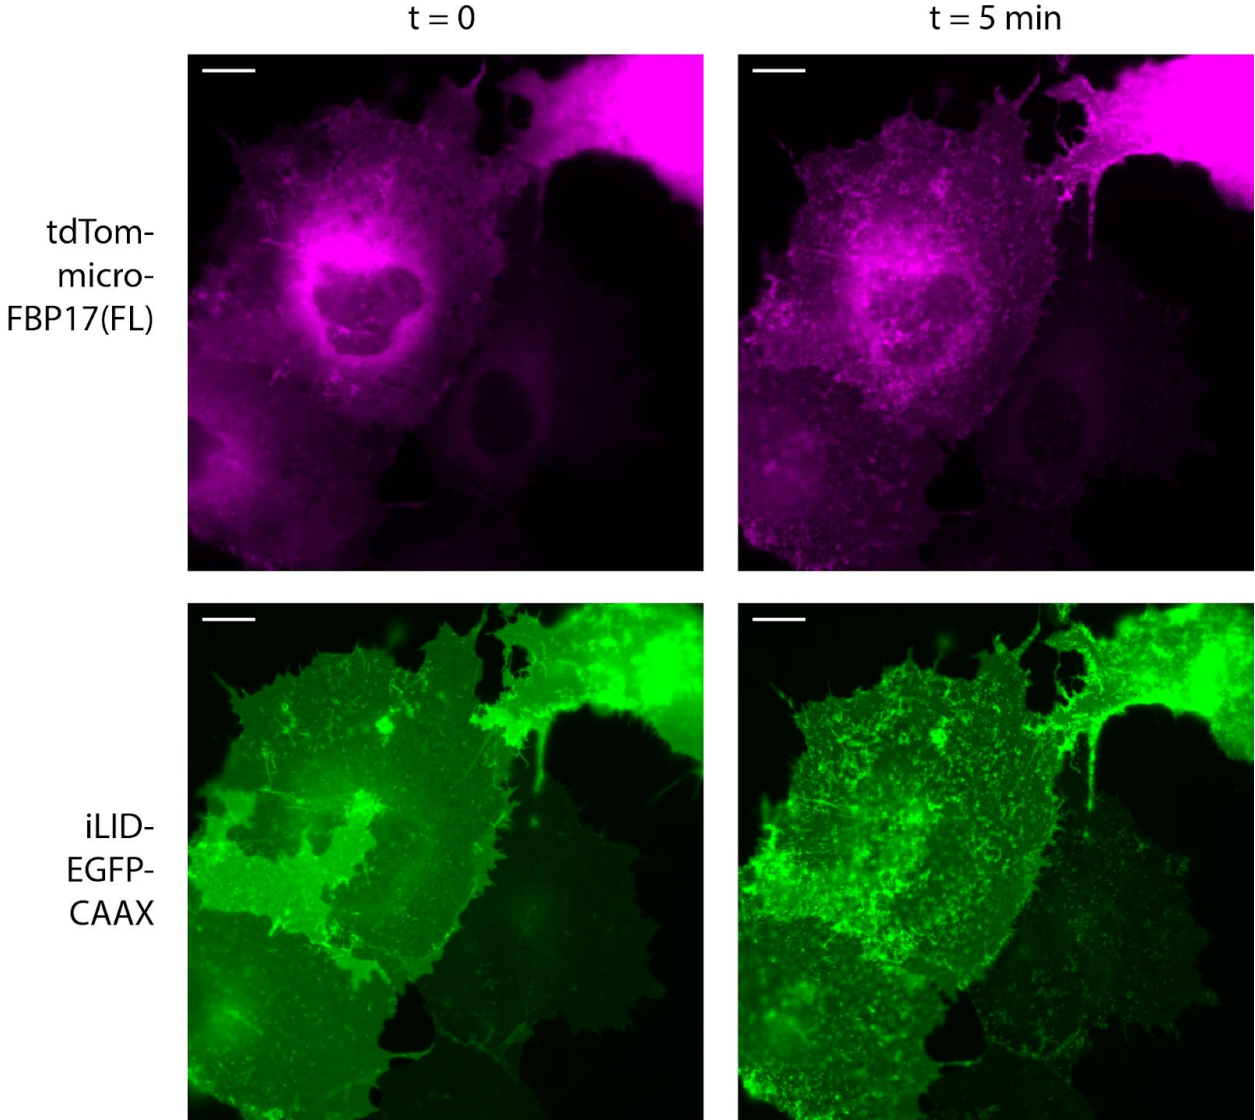

**Supplementary Figure S2:** Full field images of cells shown in Figure 2B. Scale bar = 10  $\mu\text{m}$ .

### Supplementary Figure S3

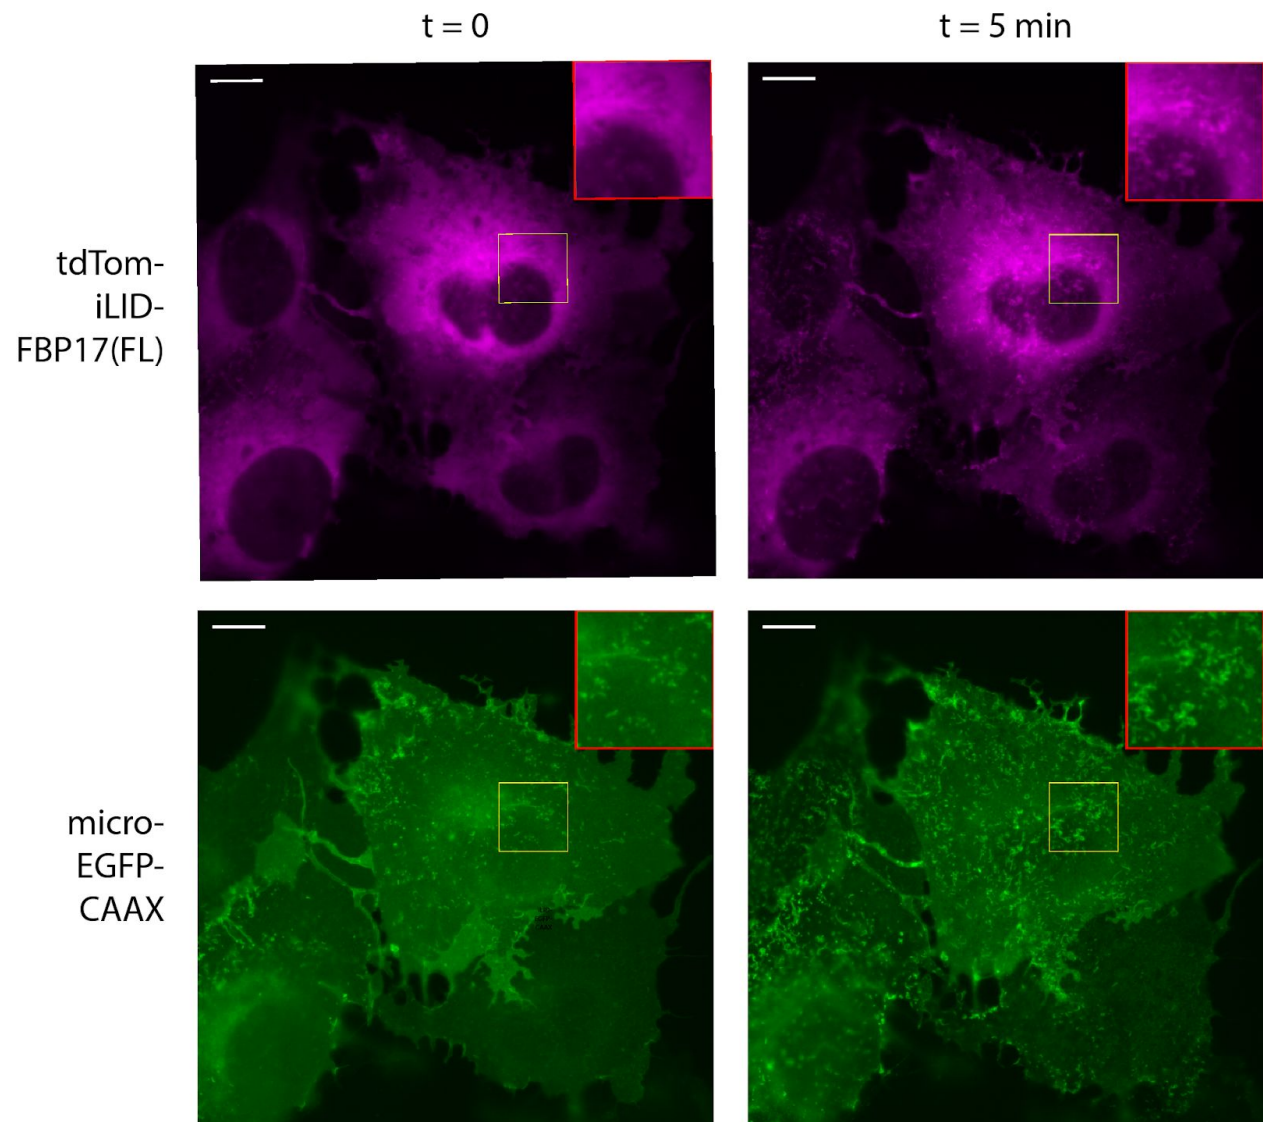

**Supplementary Figure S3:** COS7 cells expressing tdtom-iLID-FBP17(FL) and micro-EGFP-CAAX, i.e. the bait and prey positions are switched. Cells were kept in the dark prior to 5 minutes of blue light exposure. Scale bar = 10  $\mu$ m.

**Supplementary Figure S4**

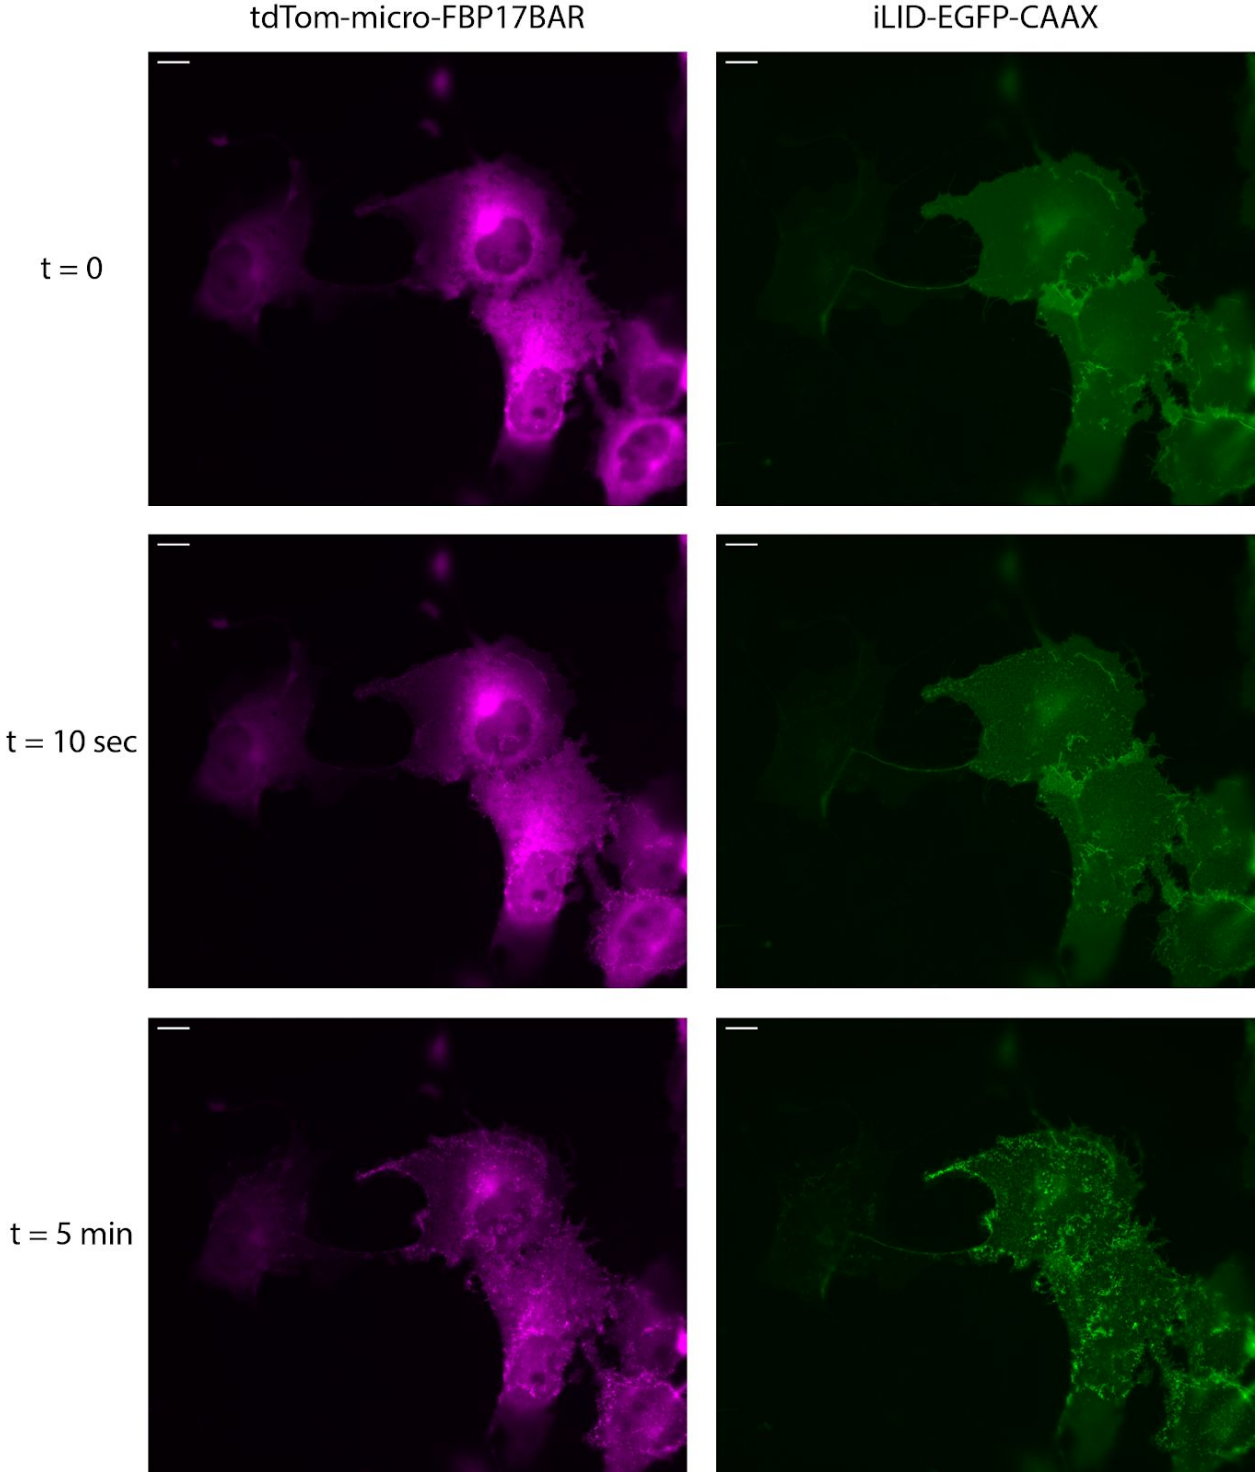

**Supplementary Figure S4:** Full field images of cells shown in Figure 2D. Scale bar = 10  $\mu$ m.



**Supplementary Figure S5**

tdTom-micro-FBP17BAR

iLID-EGFP-CAAX

t = 0

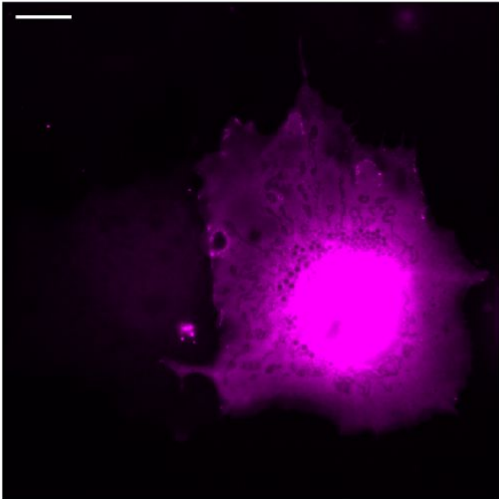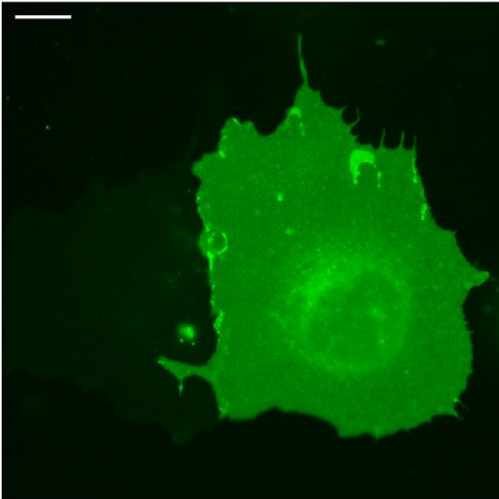

t = 5 min

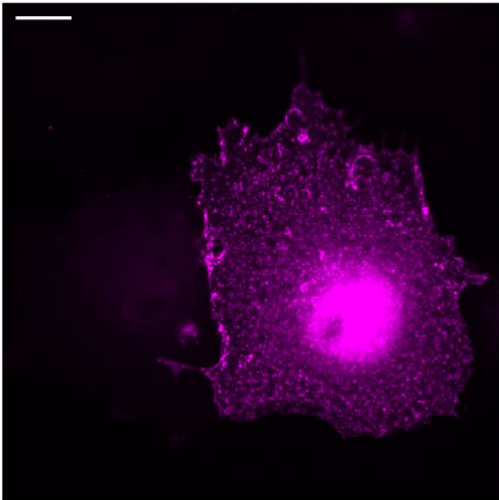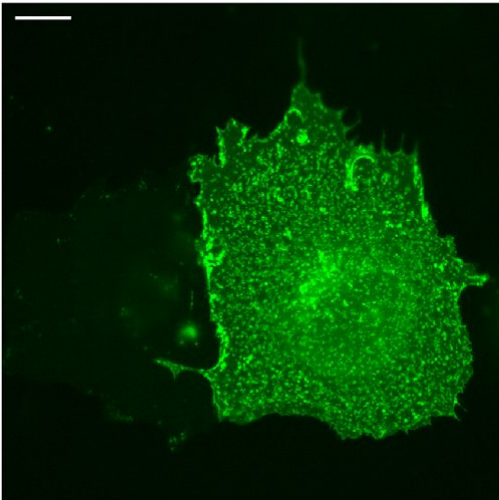

t = 35 min

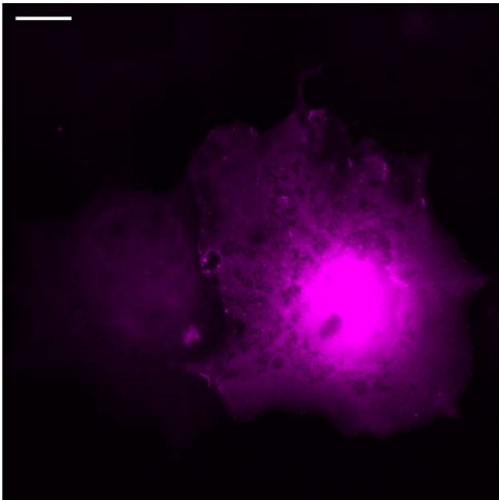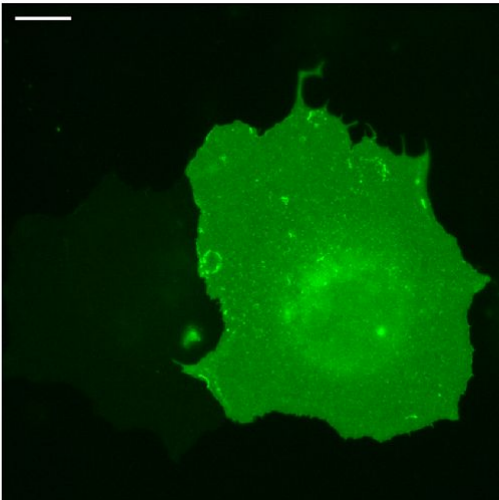

**Supplementary Figure S5:** Full field images of cells shown in Figure 3A. Scale bar = 10  $\mu$ m.

**Supplementary Figure S6**

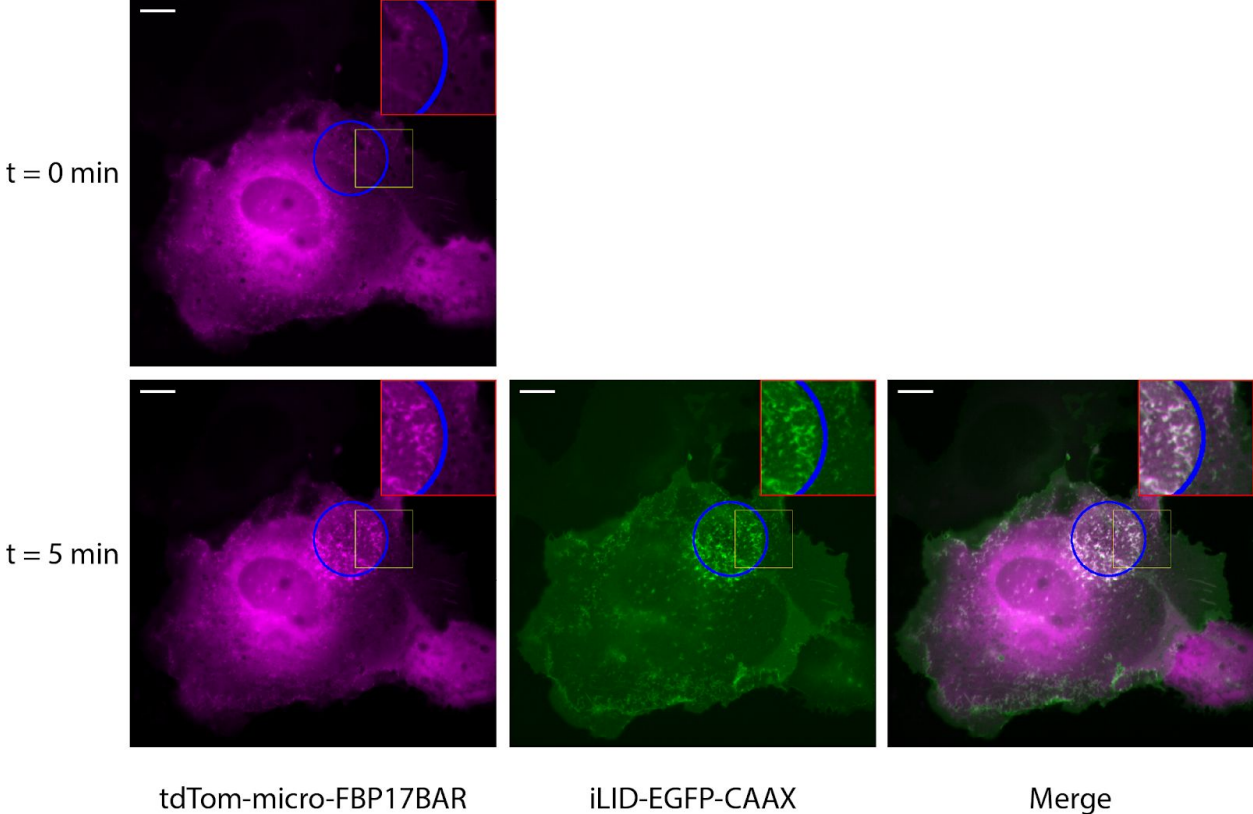

**Supplementary Figure S6:** Full field images of cells shown in Figure 3B. Blue light illumination for 5 minutes was limited to a small area of the cell (blue circle). Yellow box indicates the area shown in Figure 3B. Scale bar = 10  $\mu$ m.

Supplementary Figure S7

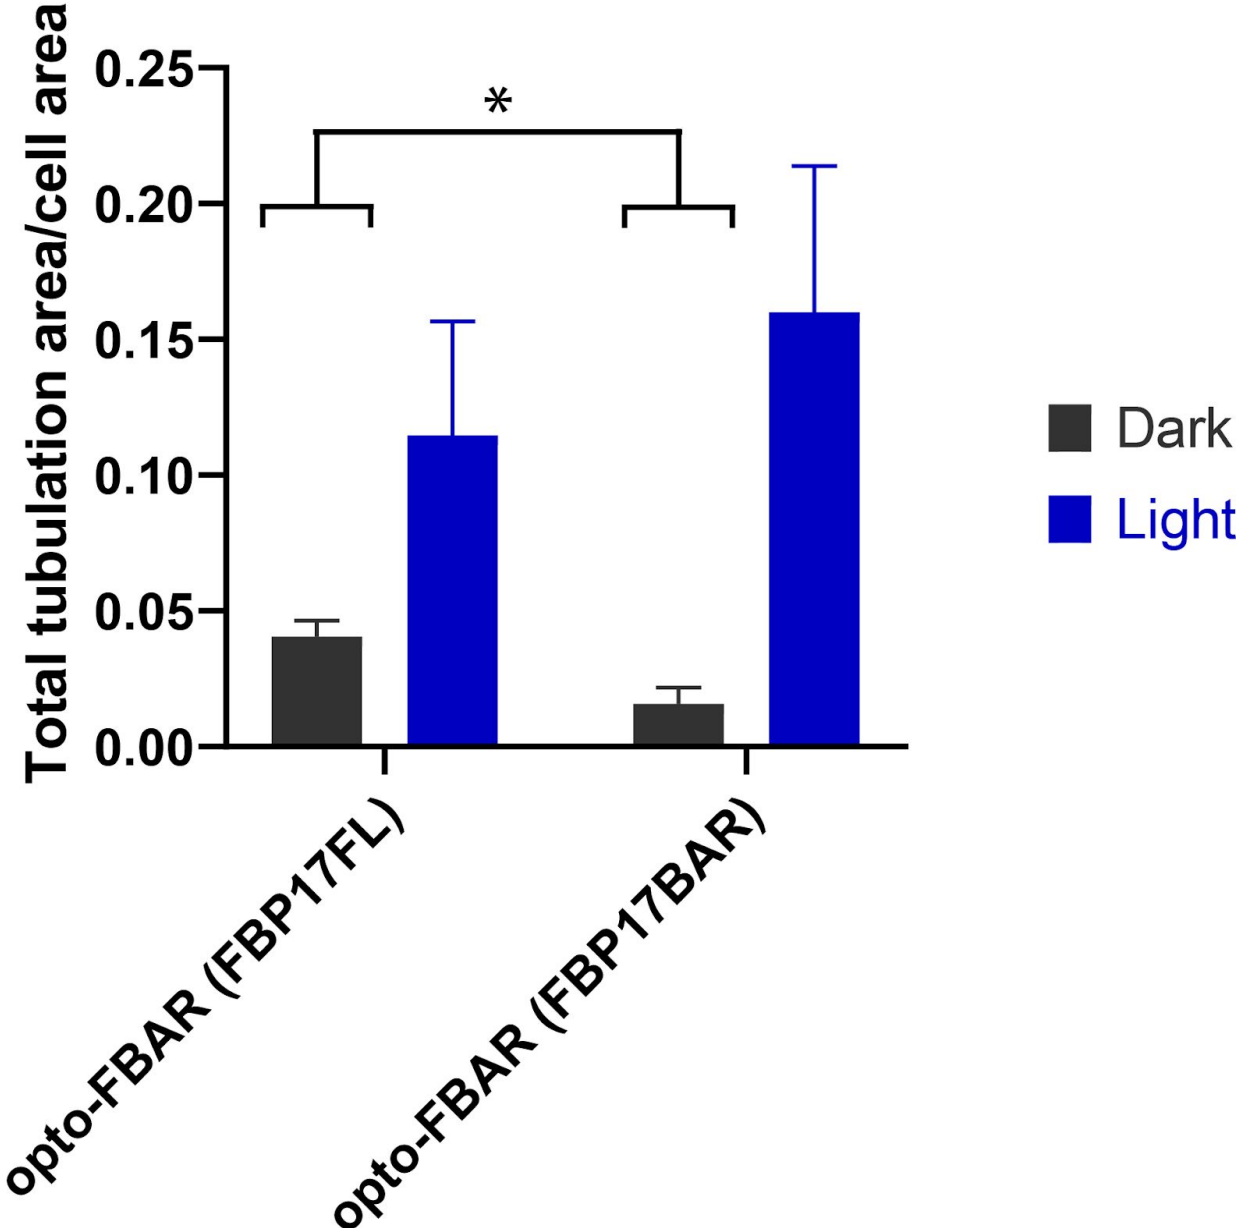

Supplementary Figure S7: TubuleTracer analysis of opto-FBAR design steps. iLID-EGFP-CAAX images acquired at t=0 were used for the “Dark” group and images acquired after 5 minutes of blue light activation were used for the “Light” group. Image acquisition was performed as stated in the Methods section. \*p < 0.05



**Supplementary Figure S8**

IRSp53(FL)-mEGFP

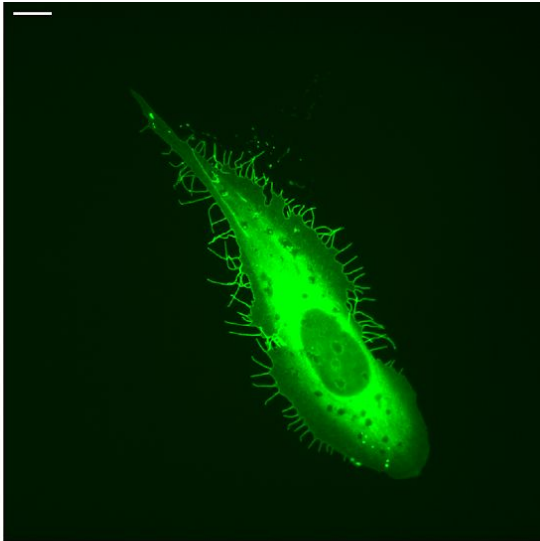

IRSp53(hv)-mEGFP

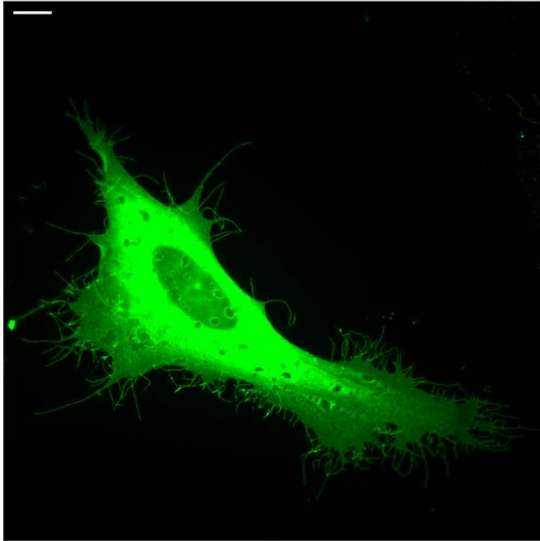

IRSp53BAR-mEGFP

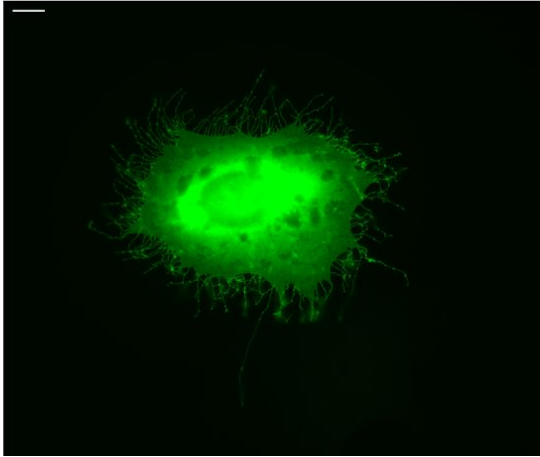

**Supplementary Figure S8:** Full field images of cells shown in Figure 4A. Scale bar = 10  $\mu$ m.

**Supplementary Figure S9**

t = 0

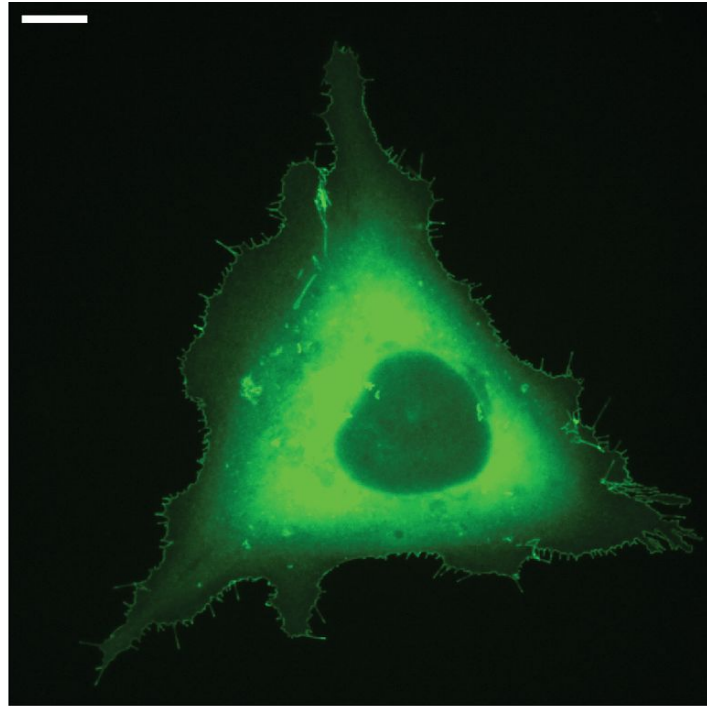

t = 5 min

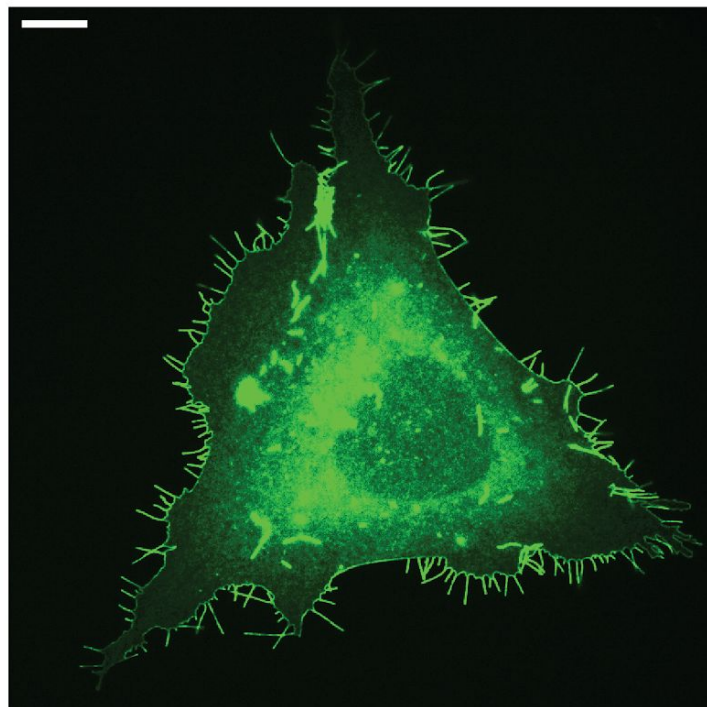

**Supplementary Figure S9:** Full field images of cells shown in Figure 4D. Scale bar = 10  $\mu\text{m}$ . *Note:* Images were bleach corrected using the histogram matching method in ImageJ.

**Supplementary Figure S10**

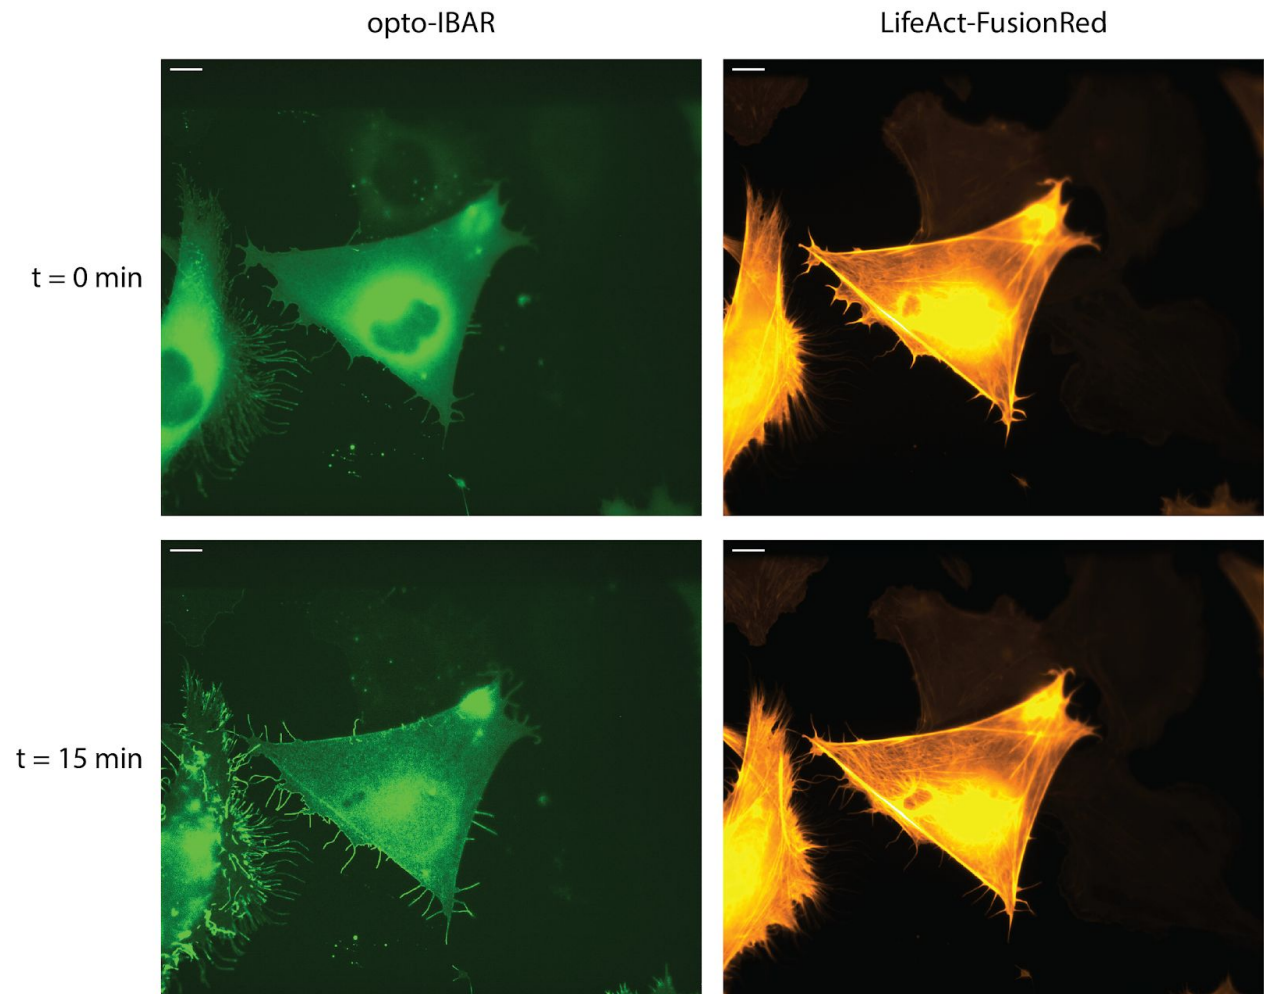

**Supplementary Figure S10:** Full field images of cells shown in Figure 5B. Scale bar = 10  $\mu\text{m}$ . *Note:* Green channel Images were bleach corrected using the histogram matching method in ImageJ.

### **Additional File Contents:**

**opto-FBAR.avi:** COS7 cells expressing the final opto-FBAR construct. Left frame: tdTom-SspBmicro-FBP17. Right frame: iLID-EGFP-CAAX. Time (min:sec).

**opto-IBAR Bleach Corrected.avi:** U2OS cells expressing the final opto-IBAR construct. Time (min:sec). *Note:* images were bleach corrected using the histogram matching method in ImageJ.

**opto-IBAR uncorrected.avi:** Cells shown in *opto-IBAR Bleach Corrected.avi* without bleach correction. Time (min:sec).

**TubuleTracer1.3.txt:** ImageJ macro designed for quantification of membrane tubulation.
